# Supplementary material for: Phytohormone Production by the Endophyte Bacillus safensis TS3 Increases Plant Yield and Alleviates Salt Stress
Source: MDPI journal article supplement (doi:10.3390/plants13010075), 2023-12-26
Supplement: s1 [file s1]

## Supplementary Materials

Table S1. Agrochemical characteristics of the soil of the potato experimental site

| pH <sub>KCl</sub> | Sum<br>N-NO <sub>3</sub><br>N-NH <sub>4</sub> | P <sub>2</sub> O <sub>5</sub> | K <sub>2</sub> O | Humus |
|-------------------|-----------------------------------------------|-------------------------------|------------------|-------|
|                   | mg/kg of soil                                 | mg/kg of soil                 |                  | %     |
| 4.95              | 24.5                                          | 342                           | 64               | 1.7   |

Table S2. Agrochemical characteristics of the soil of the white cabbages experimental site

| pH <sub>KCl</sub> | Sum<br>N-NO <sub>3</sub><br>N-NH <sub>4</sub> | P <sub>2</sub> O <sub>5</sub> | K <sub>2</sub> O | Humus |
|-------------------|-----------------------------------------------|-------------------------------|------------------|-------|
|                   | mg/kg of soil                                 | mg/kg of soil                 |                  | %     |
| 6.1               | 9.0                                           | 472                           | 167              | 1.62  |
